# Supplementary material
Source: ML conference proceedings conference paper supplement (https://openreview.net/forum?id=VFRyS7Wx08)
Supplement: supplementary_material [file attachment]

**STANFORD ACADEMIC SOFTWARE LICENSE FOR  
Stanford Docket S21-254: “IQ-Learn: State-of-the-Art Imitation Learning for AI”**

Please address any communications to: [otl@stanford.edu](mailto:otl@stanford.edu)

**By accessing the software in this folder, you are agreeing to the license terms listed below.**

1. THE BOARD OF TRUSTEES OF THE LELAND STANFORD JUNIOR UNIVERSITY (“STANFORD”) has an assignment to “IQ-Learn: State-of-the-Art Imitation Learning for AI” (“Software”), described in Stanford Docket S21-254, which was developed in the laboratory of Professor Stefano Ermon, with funding from the United States government.
2. By accessing, downloading, accepting, receiving, or using Software, including any accompanying information, materials or manuals you (“RECIPIENT”) are agreeing to be bound by the terms of this License. **If you do not agree to the terms of this License, do not download any files from this directory.**
3. STANFORD grants to RECIPIENT a royalty-free, nonexclusive, and nontransferable license to use the Software furnished hereunder, upon the terms and conditions set out below.
4. RECIPIENT acknowledges that the Software is a research tool still in the development stage and that it is being supplied as is, without any accompanying services, support or improvements from STANFORD. STANFORD makes no representations and extends no warranties of any kind, either express or implied other than set out in this License.
5. RECIPIENT agrees to use the Software solely for internal academic, non-commercial purposes and shall not distribute or transfer the Software or any of its derivatives or enhancements from RECIPIENT to another location or to any other person without prior written permission from STANFORD.
6. RECIPIENT agrees not to reverse engineer, reverse assemble, reverse compile decompile, disassemble, or otherwise attempt to re-create the source code for the Software. RECIPIENT acknowledges that any programs created based on the Software will be considered a derivative of Software and owned by STANFORD.
7. RECIPIENT may make modifications to the Software and integrate Software into RECIPIENT’s own software. All derivative works and enhancements are owned by Stanford.
8. RECIPIENT may not further distribute Software or its derivatives or enhancements without express written permission of STANFORD. If permission to transfer the Software is given, RECIPIENT warrants that RECIPIENT will not remove or export any part of the Software from the United States except in full compliance with all United States export regulations and other applicable laws.
9. RECIPIENT will use the Software in compliance with all applicable laws, policies and regulations including, but not limited to, any approvals, informed consent and patient confidentiality principles.
10. RECIPIENT will indemnify, hold harmless, and defend STANFORD against any claim of any kind arising out of or related to the exercise of any rights granted under this License or the breach of this License by RECIPIENT.

11. Title and copyright to the Software and any derivatives and any associated documentation shall at all times remain with STANFORD, and RECIPIENT agrees to preserve same.
12. If RECIPIENT plans to publish any peer reviewed papers, abstracts, or similar publications, RECIPIENT agrees to acknowledge Software and its creators in a manner consistent with academic (industry) practice.
13. If RECIPIENT decides to terminate this License, RECIPIENT shall destroy or return immediately all Software and all derivative works.
14. If RECIPIENT desires to license the Software and any patents associated with Stanford Docket S21-254 for commercial use, please contact [otl@stanford.edu](mailto:otl@stanford.edu).
